# Supplementary material for: Cilia Control Vascular Mural Cell Recruitment in Vertebrates
Source: PubMed Central journal article supplement (PMC5289940; doi:10.1016/j.celrep.2016.12.044), 2017-01-24

**Cell Reports, Volume 18**

**Supplemental Information**

**Cilia Control Vascular Mural Cell Recruitment  
in Vertebrates**

**Xiaowen Chen, Dafne Gays, Carlo Milia, and Massimo M. Santoro**

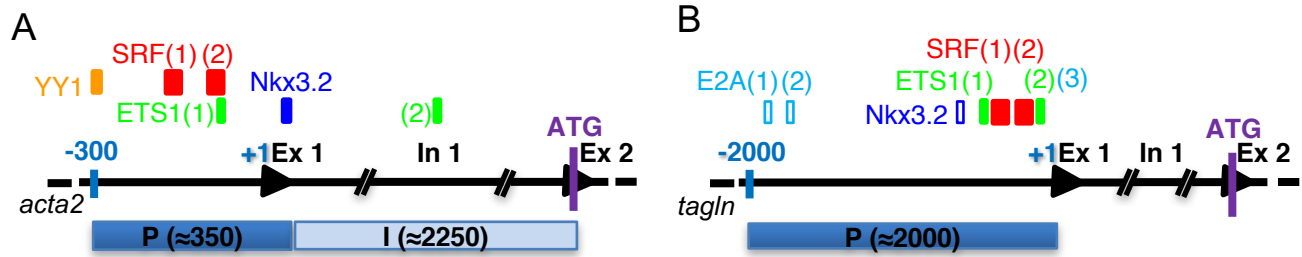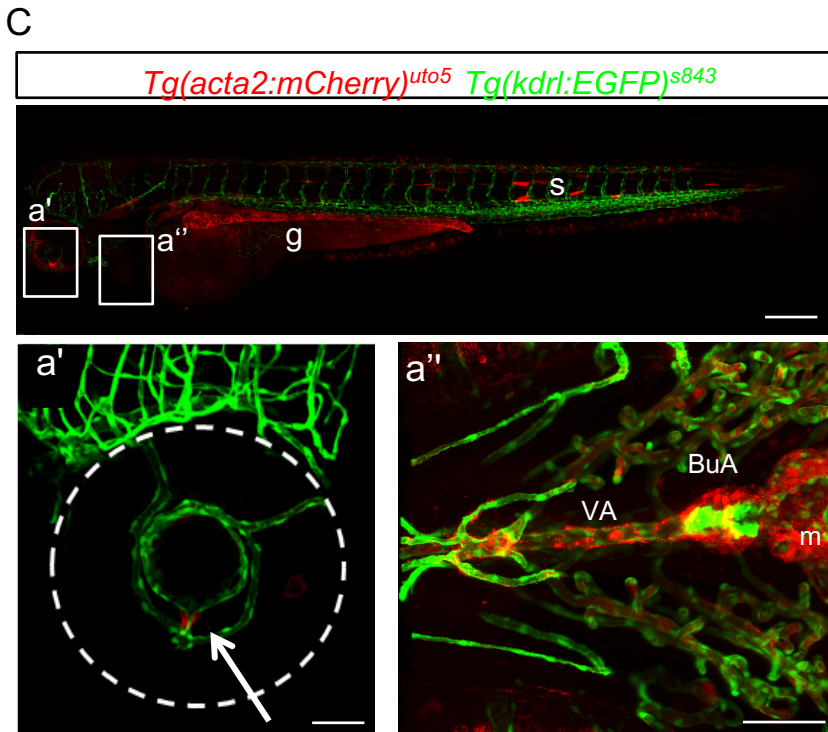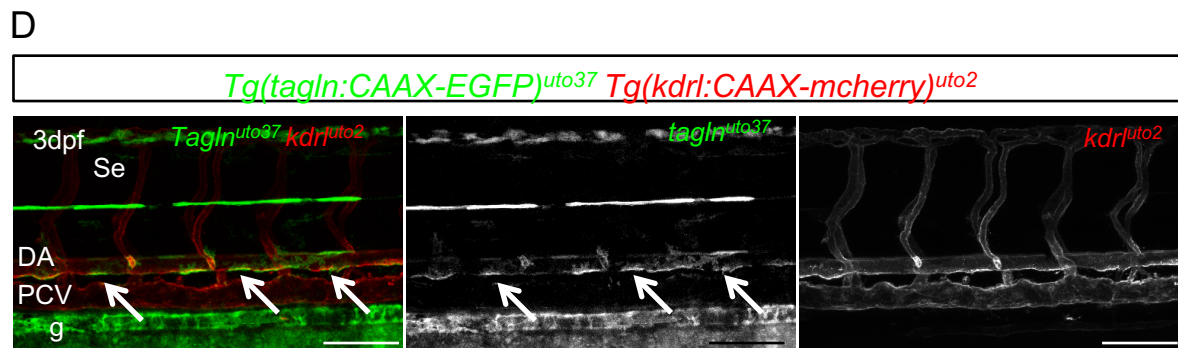

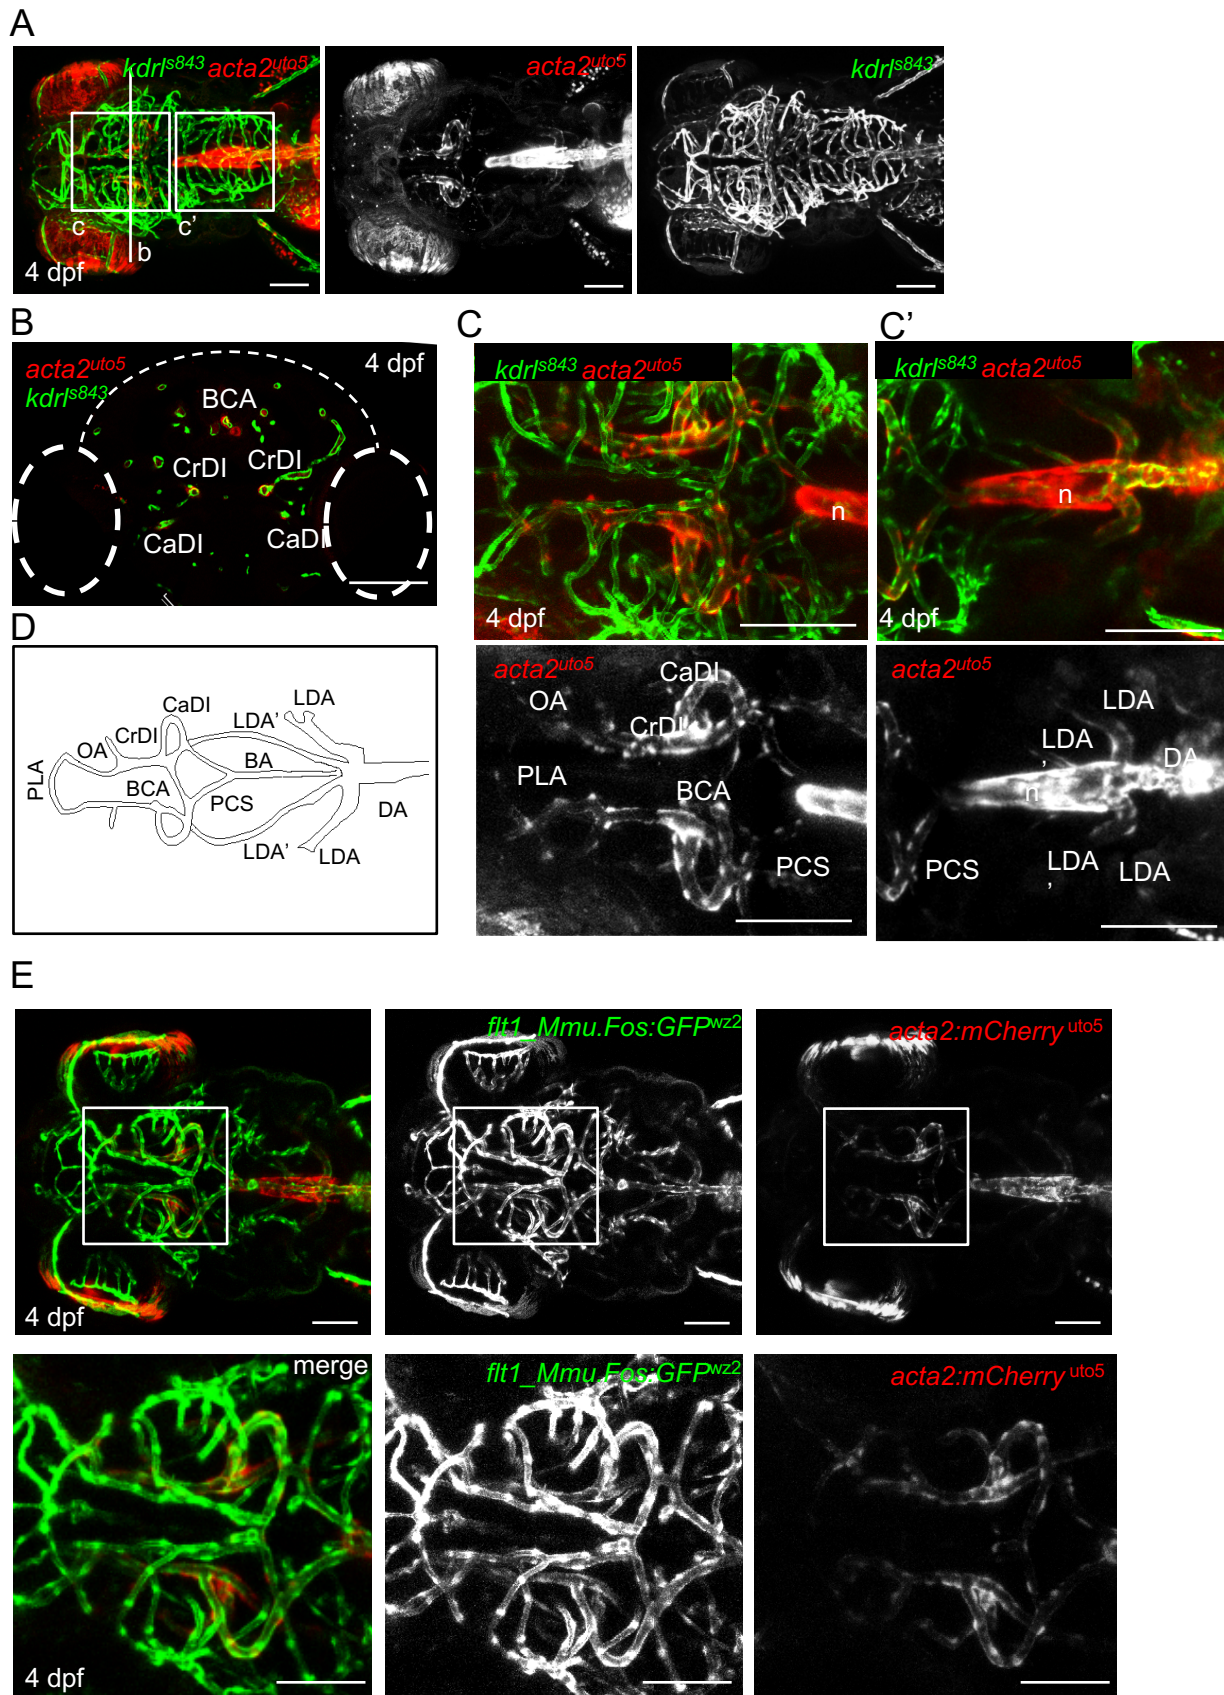

A

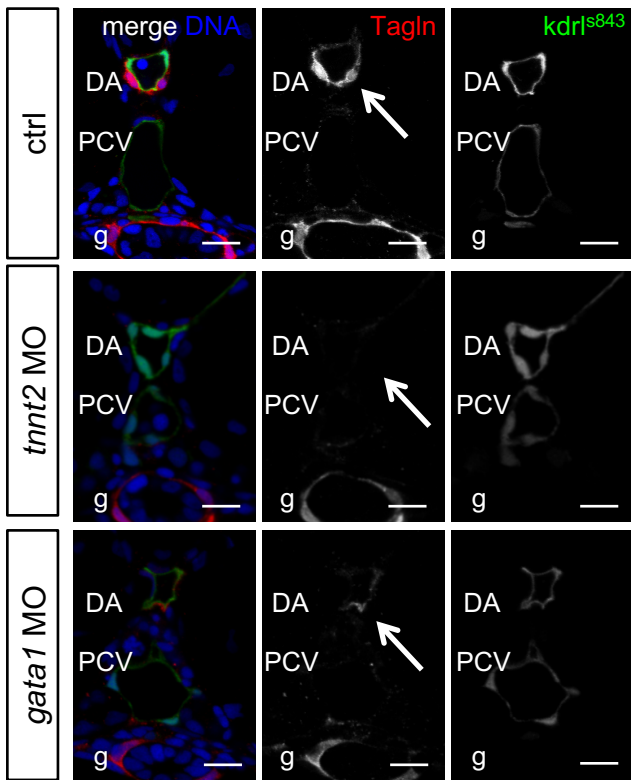



A

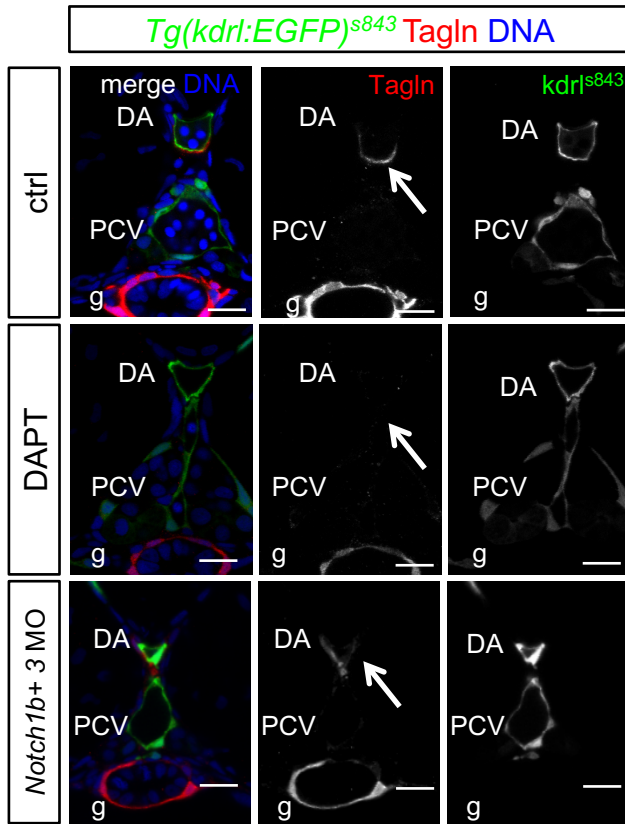

B

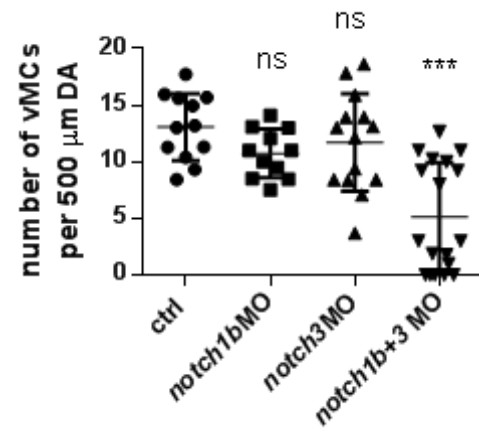

C

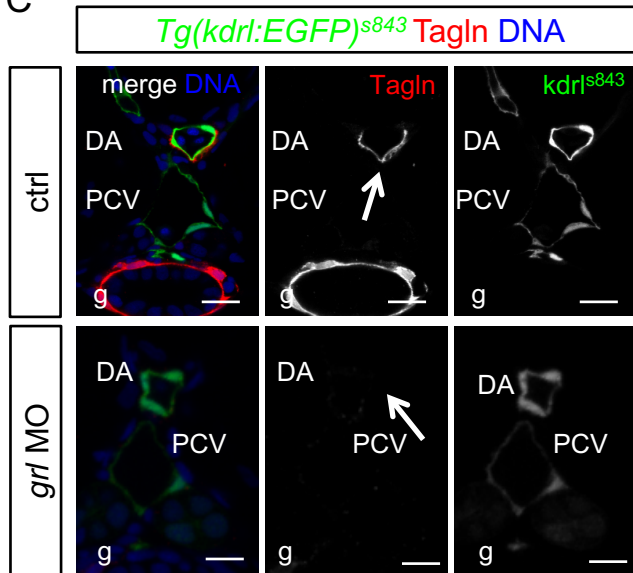

A

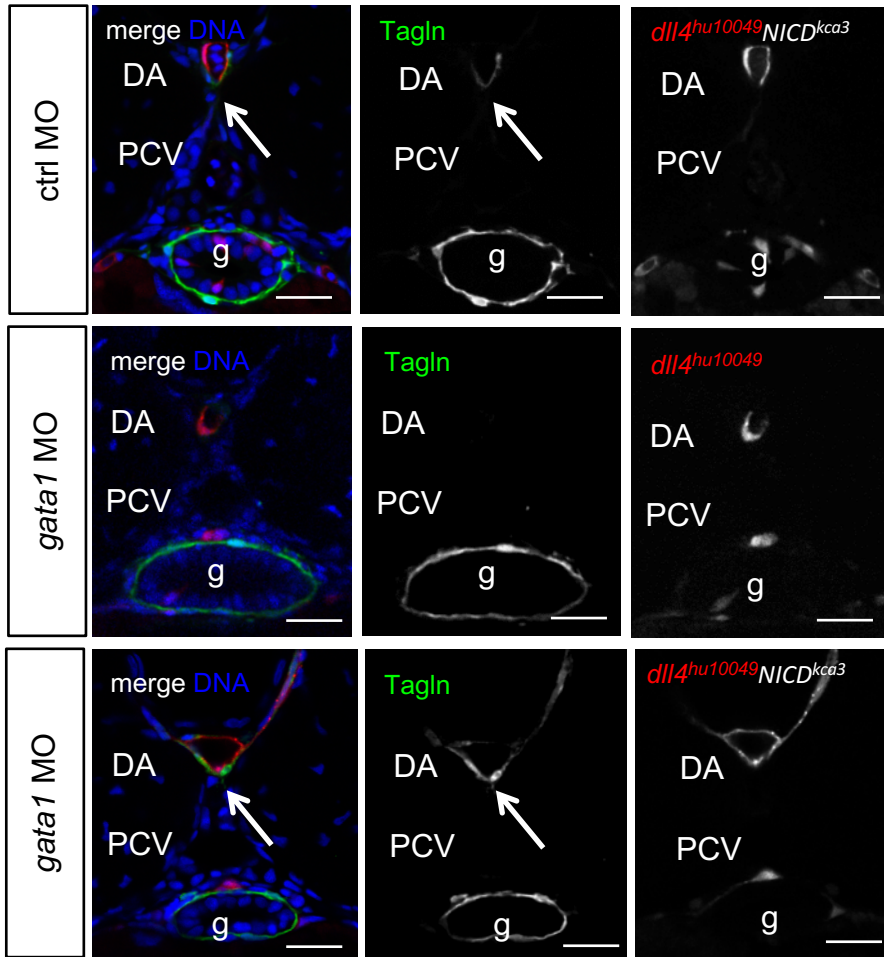

A

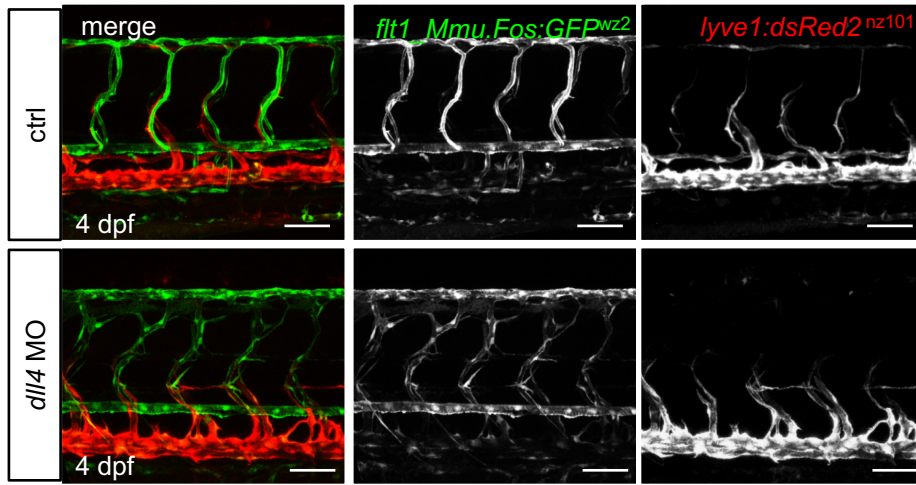

A

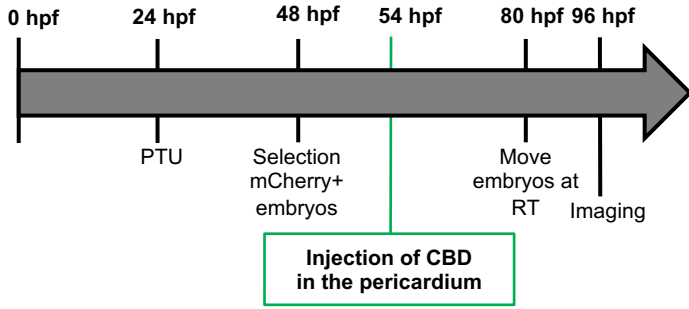

B

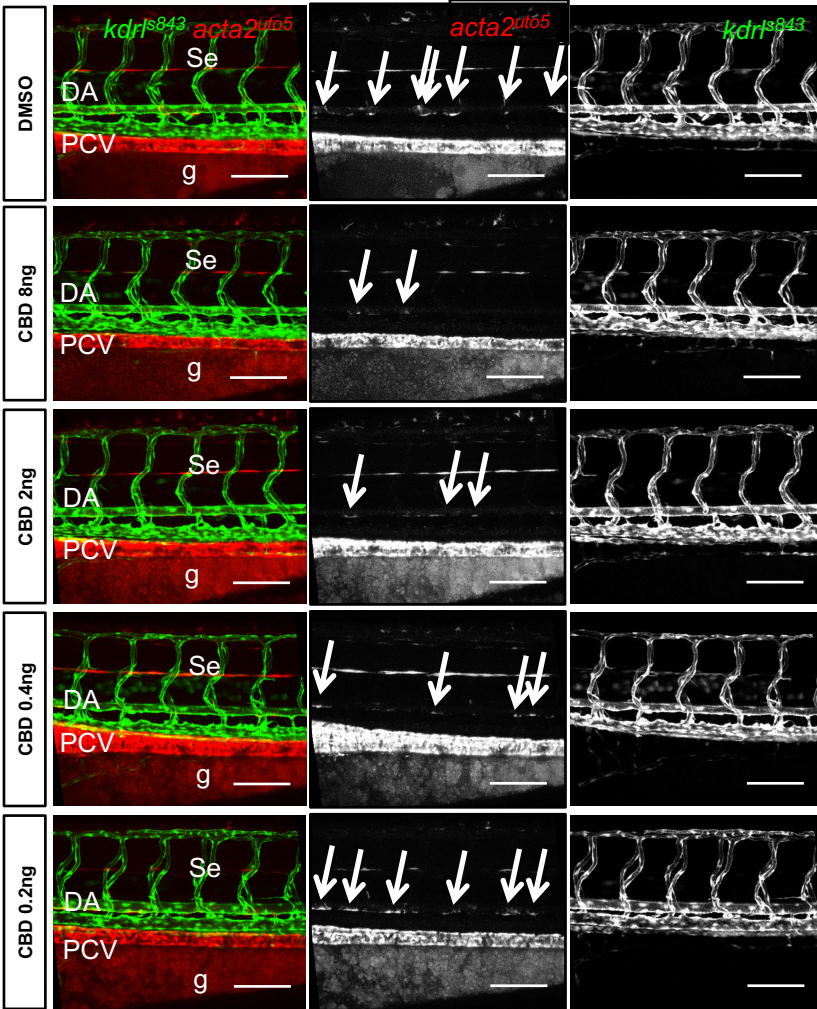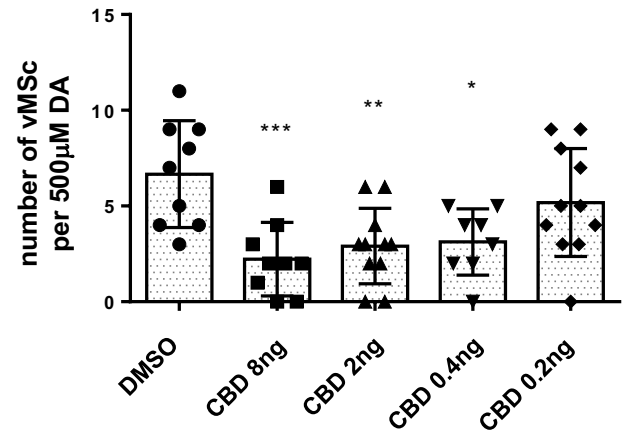

A

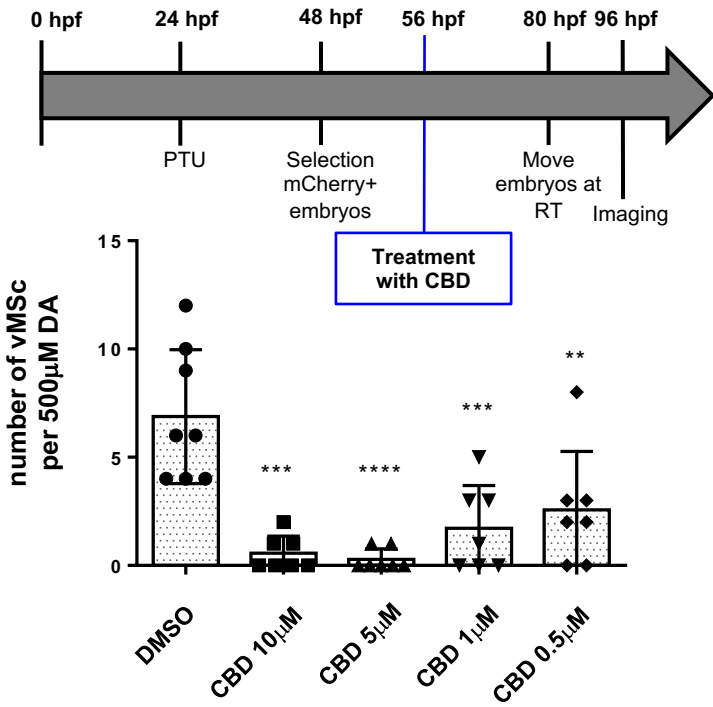

B

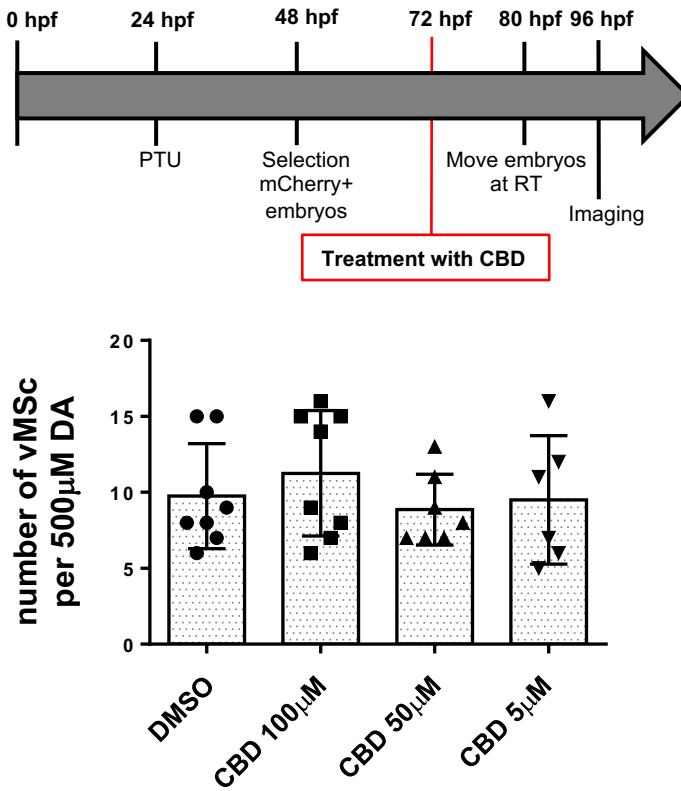



A

gRNA target sequences (red indicates NGG region)

|                           |                                        |
|---------------------------|----------------------------------------|
| <i>foxc1a</i> gRNA target | 5'-GGGTGGAAGGGATGCTGTG <b>CGG</b> -3'  |
| <i>foxc1b</i> gRNA target | 5'-GGCGGCATGGCTCGCGCAT <b>AGG</b> -3'  |
| <i>ift88</i> gRNA target  | 5'-GGCTGACCGCTATGCAGAG <b>CTGG</b> -3' |

B

*pcmlc2*:GFP;*U6*:gRNA;*fli*:Cas9 integratable vectors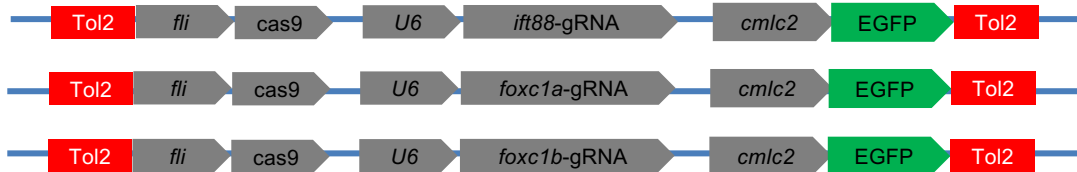

C

Workflow for endothelial cell-specific CRISP-based knockout technology

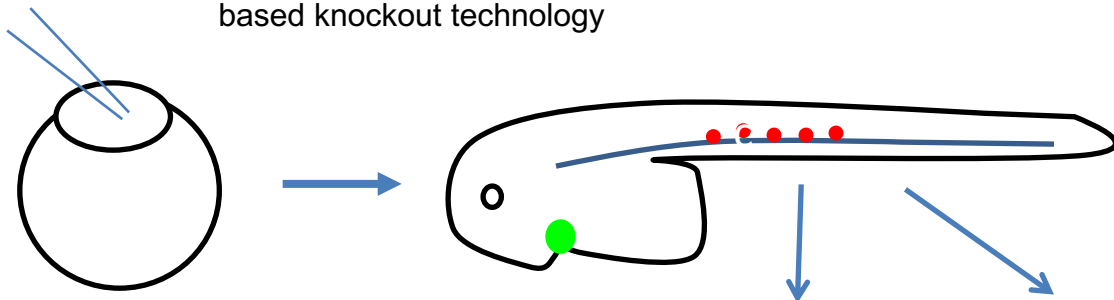

Injection of *pcmlc2*:GFP;*U6*:gRNA;*fli*:Cas9 integratable vectors with transposase mRNA into *Tg(acta2:mCherry)<sup>uto5</sup>* lines.

Analyze vMCs around DA of the *cmlc2*:GFP positive embryos at 80hpf.

Genomic DNA extraction for genotyping using T7E1 assay \*as control *cmlc2*:GFP negative embryos were used

D

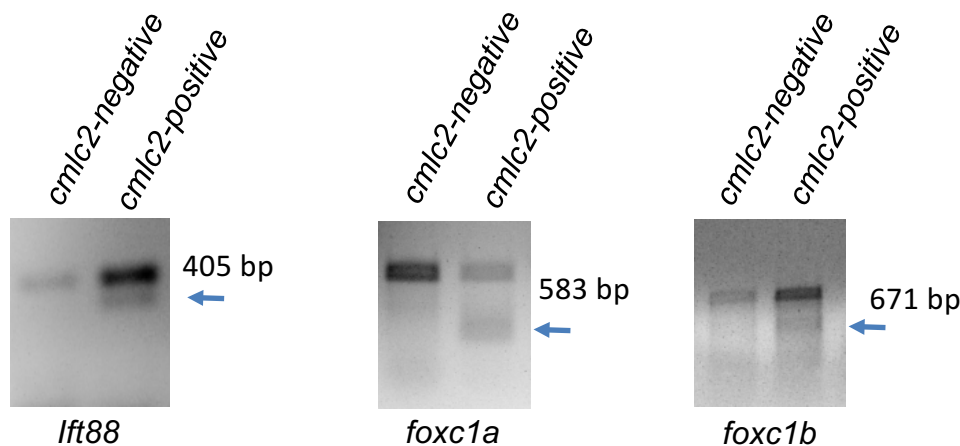

E

## Primers used for CRISPR plasmid construction

|                         |                              |
|-------------------------|------------------------------|
| <i>foxc1a</i> -gRNA-For | 5'-GGAGGACCGAGGTGTTAAAGgt-3' |
| <i>foxc1a</i> -gRNA-Rev | 5'-CTTTAACACCTCGGTCCTCCga-3' |
| <i>foxc1b</i> -gRNA-For | 5'-GGCGGCATGGCTCGCGCATAgt-3' |
| <i>foxc1b</i> -gRNA-Rev | 5'-TATGCGCGAGCCATGCCGCCga-3' |
| <i>ift88</i> -gRNA-For  | 5'-GGCTGACCGCTATGCAGAGCgt-3' |
| <i>ift88</i> -gRNA-Rev  | 5'-GCTCTGCATAGCGGTCAGCCga-3' |

F

## Primers used for T7E1 assay

|                        |                              |
|------------------------|------------------------------|
| <i>foxc1a</i> -PCR-For | 5'-CGGAAAAGGCAGCTACTGGA-3'   |
| <i>foxc1a</i> -PCR-Rev | 5'-GGTAGTCGAGATAGAGTACTGG-3' |
| <i>foxc1b</i> -PCR-For | 5'-CCCTTTAGGCGTTGTGCCTTAT-3' |
| <i>foxc1b</i> -PCR-Rev | 5'-TGTCTGGGCTCTCCGTTTTA-3'   |
| <i>ift88</i> -PCR-For  | 5'-GTAATGGCTGCCAGTTTAC-3'    |
| <i>ift88</i> -PCR-Rev  | 5'-TACGTCAAACCTGCATGATG-3'   |

A

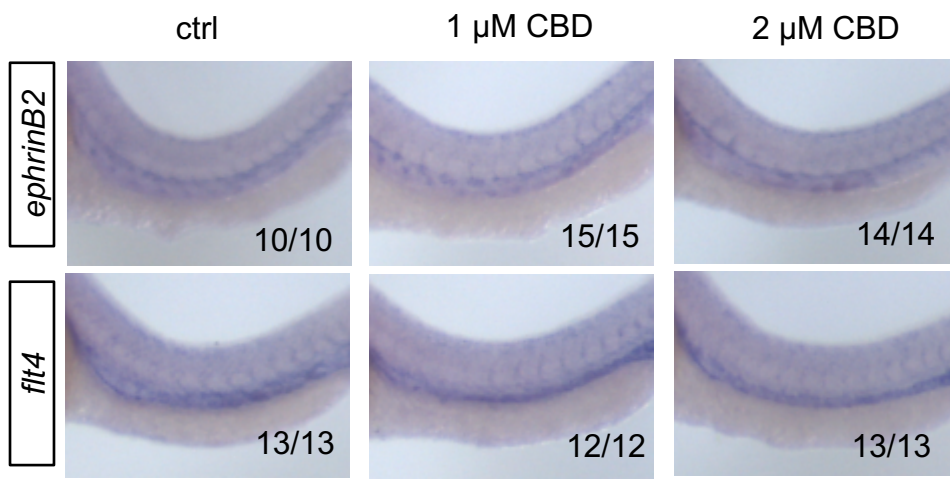

A

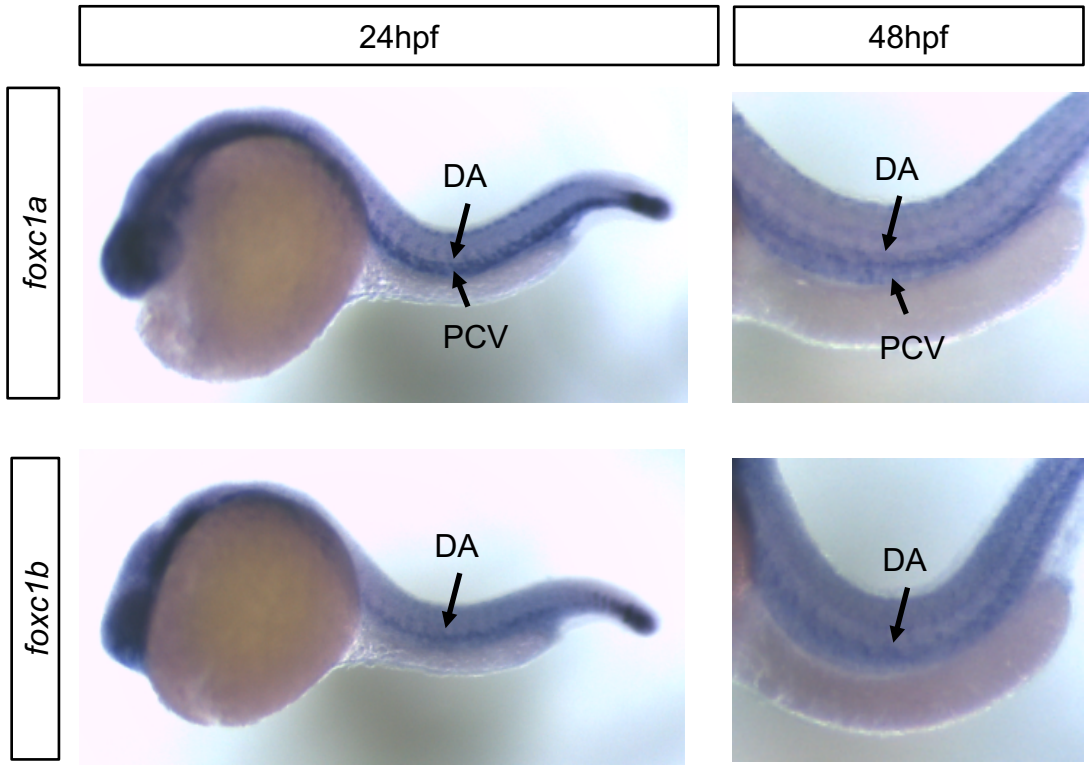

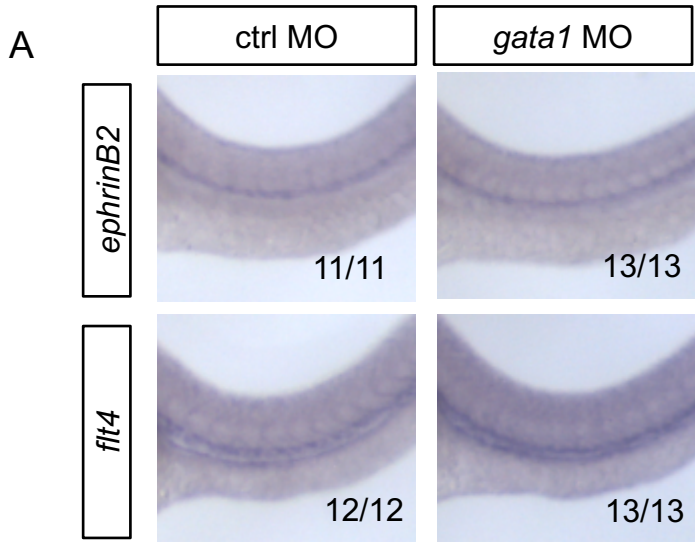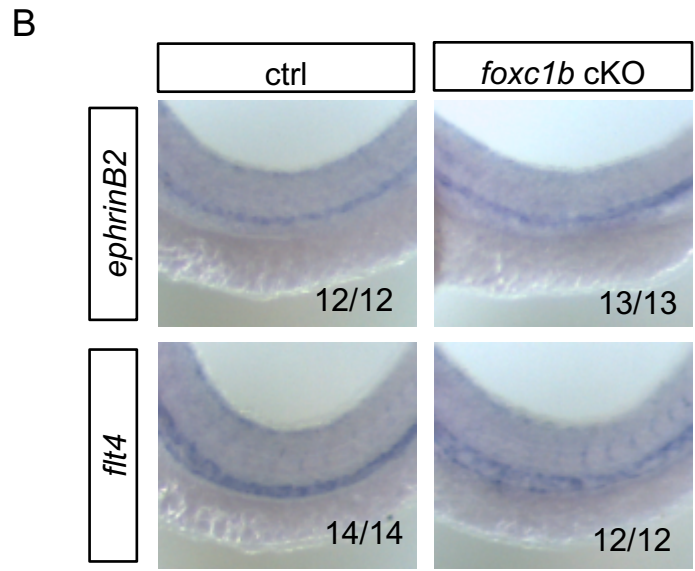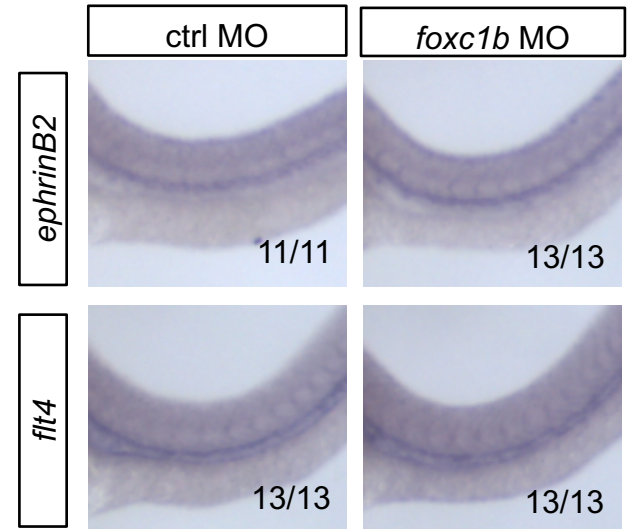



A

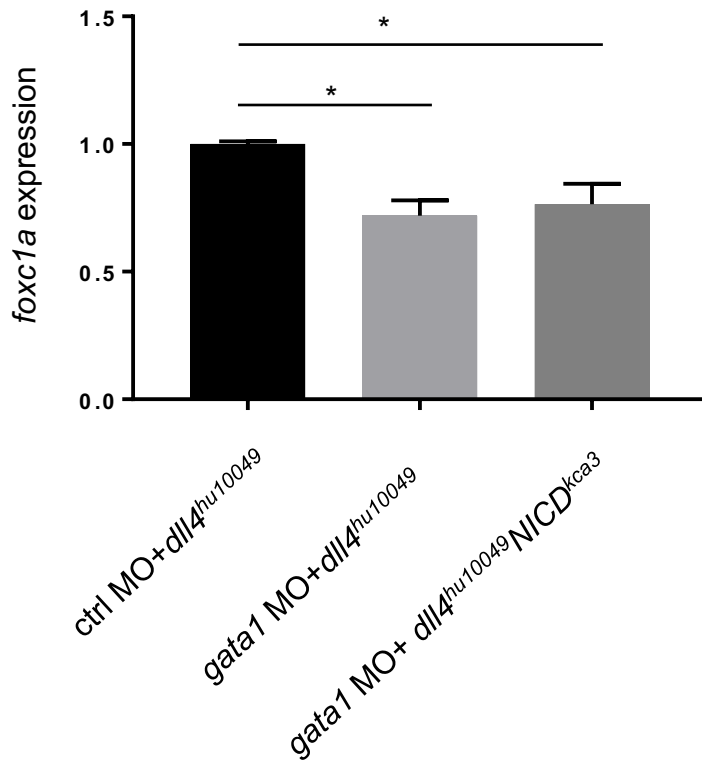

Supplement: mmc1.pdf [file mmc1.pdf]
